# Supplementary material for: An electrochemiluminescent microRNA biosensor based on hybridization chain reaction coupled with hemin as the signal enhancer
Source: Royal Society of Chemistry journal article supplement (doi:10.1039/c4an00284a), 2014-01-01
Supplement: c4an00284a1.pdf [file c4an00284a1.pdf]

*Electronic Supplementary Information*

**An electrochemiluminescent microRNA biosensor based on  
hybridization chain reaction coupled with hemin as the  
signal enhancer**

Pu Zhang, Xiaoyan Wu, Yaqin Chai\*, Ruo Yuan

*Education Ministry Key Laboratory on Luminescence and Real-Time Analysis,  
College of Chemistry and Chemical Engineering, Chongqing 400715, People's  
Republic of China*

### ***S1. the SEM image of the Au NPs***

As shown in the Fig. S1., Au NPs were electrodeposited on the surface of the electrode rather than a Au thin layer film, which provided valuable data about the real shapes of the nanoparticles.

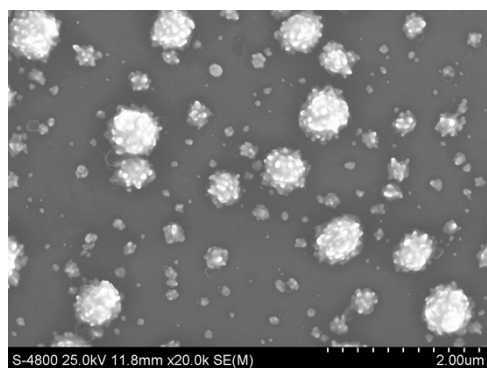

**Fig. S1.** SEM image of Au NPs.

### ***S2. ECL comparison of hemin and HRP for miRNA detection***

Both hemin and HRP showed peroxidatic activity on luminol/H<sub>2</sub>O<sub>2</sub> system through catalyzing the decomposition of H<sub>2</sub>O<sub>2</sub>. In order to further investigate the effect of hemin and HRP, we detected the ECL intensity with hemin (7 μM) and HRP (7 μM) modified GCE in 2 mL PBS (pH 7.4) with 1.00×10<sup>-4</sup> M luminol and 3.50×10<sup>-5</sup> M H<sub>2</sub>O<sub>2</sub>, respectively. As can be seen from Fig. S2, HRP/GCE showed a lower ECL intensity, indicating the poor catalytic efficiency to H<sub>2</sub>O<sub>2</sub> (curve blue). However, an obviously amplified ECL signal of hemin/GCE was achieved (curve red). Such results indicated the excellent amplified property of the proposed biosensor with hemin, which may ascribe to the following reasons: hemin, which is enable to maintain high catalytic activities, showed remarkable catalyzing performance towards H<sub>2</sub>O<sub>2</sub>. Besides, hemin was introduced by intercalating into the grooves of the dsDNA, so there were

amounts of hemin to catalyze the decomposition of  $\text{H}_2\text{O}_2$ . The biocompatible dsDNA could not only improve the amount of immobilized hemin but also efficiently maintain its catalytic activity and improve the stability. However, there were a small number of HRP immobilized on the surface of the electrode. Based on the above advantages, application of hemin modified electrode is becoming a commonly used method to sensitize and amplified the ECL signal<sup>1-2</sup>.

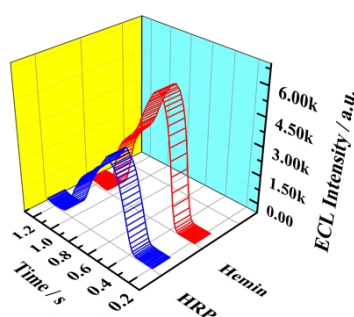

**Fig. S2.** ECL intensity of the biosensor in 2 mL PBS (pH 7.4) with  $1.00 \times 10^{-4}$  M luminol and  $3.50 \times 10^{-5}$  M  $\text{H}_2\text{O}_2$  by using different catalysts: the blue one is the biosensor with  $7 \mu\text{M}$  HRP as the enhancer, the red one is the biosensor with  $7 \mu\text{M}$  hemin as the enhancer.

**Reference:**

- 1 P. Kara, D. Ozkan, K. Kerman, B. Meric, A. Erdem, M. Ozsoz, *Analytical and Bioanalytical Chemistry*, 2002, **373**, 710-716.
- 2 R. L. Af, G. C. Mueller, *The journal of biological chemistry*, 1983, **258**, 12069-12072.
